# Supplementary material for: Adherence to a Healthy Lifestyle in Association With Microvascular Complications Among Adults With Type 2 Diabetes
Source: PubMed Central journal article supplement (PMC9880795; doi:10.1001/jamanetworkopen.2022.52239), 2023-01-26
Supplement: jamanetwopen-e2252239-s001.pdf [file jamanetwopen-e2252239-s001.pdf]

## Supplemental Online Content

Liu G, Li Y, Pan A, et al. Adherence to a healthy lifestyle in association with microvascular complications among adults with type 2 diabetes. *JAMA Netw Open*. 2023;6(1):e2252239. doi:10.1001/jamanetworkopen.2022.52239

**eTable 1.** Basic Characteristics of Diabetes Patients at Diagnosis in NHS and HPFS

**eTable 2.** Stratified Analysis of Diabetic Microvascular Complications According to Number of Low-Risk Lifestyle Factors Before Diabetes Diagnosis

**eTable 3.** Stratified Analysis of Diabetic Microvascular Complications According to Number of Low-Risk Lifestyle Factors After Diabetes Diagnosis

**eTable 4.** Relative Risk (95% CI) of Diabetic Microvascular Complications According to Different Combinations of Low-Risk Lifestyle Factors Before Diabetes Diagnosis

**eTable 5.** Relative Risk (95% CI) of Diabetic Microvascular Complications According to Different Combinations of Low-Risk Lifestyle Factors After Diabetes Diagnosis

This supplemental material has been provided by the authors to give readers additional information about their work.

**eTable 1.** Basic Characteristics of Diabetes Patients at Diagnosis in NHS and HPFS<sup>a</sup>

|                                      | <b>NHS (n=4,982)</b> | <b>HPFS (n=2,095)</b> |
|--------------------------------------|----------------------|-----------------------|
| Age, years                           | 60.4 (8.9)           | 61.9 (8.5)            |
| Body Mass Index, kg/m <sup>2</sup>   | 31.5 (6.1)           | 29.0 (4.5)            |
| Physical activity, Met-hrs/week      | 6.3 (2.0, 15.9)      | 15.1 (4.9, 33.8)      |
| Alcohol consumption, g/day           | 0 (0, 2.1)           | 3.9 (0, 12.9)         |
| Alternate Healthy Eating Index       | 44.4 (11.1)          | 46.7 (10.6)           |
| Total energy intake, kcal/day        | 1755.1 (562.7)       | 2010.8 (642.5)        |
| White, %                             | 95.8                 | 90.5                  |
| Smoking status, %                    |                      |                       |
| Never                                | 45.1                 | 38.0                  |
| Past                                 | 42.0                 | 54.4                  |
| Current                              | 11.9                 | 7.6                   |
| Hypertension, %                      | 65.0                 | 52.0                  |
| Hypercholesterolemia, %              | 51.9                 | 47.0                  |
| Family history of MI, %              | 30.8                 | 35.7                  |
| Aspirin use, %                       | 48.3                 | 46.1                  |
| Use of antihypertensive drugs, %     | 46.4                 | 40.3                  |
| Use of cholesterol-lowering drugs, % | 15.9                 | 14.8                  |

<sup>a</sup> Values are means (SD), median (interquartile range), or %; NHS: Nurses' Health Study (in 2000 and 2005); HPFS: Health Professionals' Follow-Up Study (in 2000, 2004, and 2008); MI: myocardial infarction.

**eTable 2.** Stratified Analysis of Diabetic Microvascular Complications According to Number of Low-Risk Lifestyle Factors Before Diabetes Diagnosis

|                                 | Number of Low-Risk Lifestyle Factors <sup>a</sup> |                  |                  |                  |                  | <i>P</i> trend |
|---------------------------------|---------------------------------------------------|------------------|------------------|------------------|------------------|----------------|
|                                 | 0                                                 | 1                | 2                | 3                | ≥4               |                |
| <b>Age at diagnosis (years)</b> |                                                   |                  |                  |                  |                  |                |
| <60                             | 1.00 (ref)                                        | 0.88 (0.75-1.04) | 0.85 (0.72-1.00) | 0.80 (0.65-0.99) | 0.64 (0.46-0.90) | 0.004          |
| ≥60                             | 1.00 (ref)                                        | 0.94 (0.74-1.18) | 0.96 (0.76-1.21) | 0.89 (0.69-1.13) | 0.82 (0.61-1.10) | 0.17           |
| <b>Sex/Cohort</b>               |                                                   |                  |                  |                  |                  |                |
| Women/NHS                       | 1.00 (ref)                                        | 0.91 (0.78-1.07) | 0.90 (0.77-1.06) | 0.87 (0.72-1.05) | 0.75 (0.55-1.03) | 0.08           |
| Men/HPFS                        | 1.00 (ref)                                        | 0.81 (0.63-1.02) | 0.81 (0.65-1.03) | 0.74 (0.58-0.95) | 0.66 (0.50-0.89) | 0.008          |

Multivariable model was adjusted for age at diagnosis (years), sex (men, women), race (white, non-white), total energy intake (in quartiles), current aspirin use (yes, no), presence of hypertension (yes, no), presence of hypercholesterolemia (yes, no), use of antihypertensive drugs (yes, no), and use of cholesterol-lowering drugs (yes, no). Strata variable was not included in the model when stratifying by itself.

<sup>a</sup> Low-risk lifestyle factors: non-smoking, healthy body weight ( $18.5 \leq \text{BMI shortly after diagnosis} < 25 \text{ kg/m}^2$ ), moderate to vigorous physical activity (>150 min/week), high quality diet (top two fifths of Alternative Healthy Eating Index), and moderate alcohol consumption (5-15 g/day for female and 5-30 g/day for male).

**eTable 3.** Stratified Analysis of Diabetic Microvascular Complications According to Number of Low-Risk Lifestyle Factors After Diabetes Diagnosis

|                                                  | Number of Low-Risk Lifestyle Factors <sup>a</sup> |                  |                  |                  |                  | P trend |
|--------------------------------------------------|---------------------------------------------------|------------------|------------------|------------------|------------------|---------|
|                                                  | 0                                                 | 1                | 2                | 3                | ≥4               |         |
| <b>Age at diagnosis (years)</b>                  |                                                   |                  |                  |                  |                  |         |
| <60                                              | 1.00 (ref)                                        | 0.87 (0.74-1.03) | 0.90 (0.76-1.06) | 0.81 (0.67-0.99) | 0.64 (0.47-0.87) | 0.01    |
| ≥60                                              | 1.00 (ref)                                        | 1.04 (0.78-1.38) | 0.95 (0.72-1.26) | 0.91 (0.68-1.22) | 0.76 (0.54-1.06) | 0.01    |
| <b>Sex/Cohort</b>                                |                                                   |                  |                  |                  |                  |         |
| Women/NHS                                        | 1.00 (ref)                                        | 0.95 (0.80-1.12) | 0.91 (0.77-1.09) | 0.86 (0.70-1.05) | 0.66 (0.48-0.92) | 0.01    |
| Men/HPFS                                         | 1.00 (ref)                                        | 0.79 (0.61-1.01) | 0.78 (0.61-1.00) | 0.74 (0.57-0.96) | 0.61 (0.46-0.82) | 0.003   |
| <b>Lifestyle score before diabetes diagnosis</b> |                                                   |                  |                  |                  |                  |         |
| <2                                               | 1.00 (ref)                                        | 0.94 (0.80-1.10) | 0.91 (0.77-1.09) | 0.84 (0.65-1.10) | 0.71 (0.33-1.50) | 0.14    |
| ≥2                                               | 1.00 (ref)                                        | 0.80 (0.47-1.36) | 0.77 (0.46-1.31) | 0.73 (0.43-1.25) | 0.60 (0.34-1.04) | 0.004   |

Multivariable model was adjusted for age at diagnosis (years), sex (men, women), race (white, non-white), total energy intake (in quartiles), current aspirin use (yes, no), presence of hypertension (yes, no), presence of hypercholesterolemia (yes, no), use of antihypertensive drugs (yes, no), use of cholesterol-lowering drugs (yes, no), and lifestyle score before diabetes diagnosis. Strata variable was not included in the model when stratifying by itself.

<sup>a</sup>Low-risk lifestyle factors: non-smoking, healthy body weight ( $18.5 \leq \text{BMI}$  shortly after diagnosis  $< 25 \text{ kg/m}^2$ ), moderate to vigorous physical activity ( $> 150 \text{ min/week}$ ), high quality diet (top two fifths of Alternative Healthy Eating Index), and moderate alcohol consumption (5-15 g/day for female and 5-30 g/day for male).

**eTable 4.** Relative Risk (95% CI) of Diabetic Microvascular Complications According to Different Combinations of Low-Risk Lifestyle Factors Before Diabetes Diagnosis

|                                                                                       | Number of Low-Risk Lifestyle Factors* |                  |                  |                  |                  | P trend |
|---------------------------------------------------------------------------------------|---------------------------------------|------------------|------------------|------------------|------------------|---------|
|                                                                                       | 0                                     | 1                | 2                | 3                | ≥4               |         |
| <b>Three low-risk factors (healthy diet, regular physical activity, non-smoking)</b>  |                                       |                  |                  |                  |                  |         |
| N                                                                                     | 773                                   | 2,952            | 3,352            |                  |                  |         |
| Multivariable-adjusted model                                                          | 1.00 (ref)                            | 0.88 (0.78-0.98) | 0.86 (0.76-0.96) | -                | -                | 0.03    |
| <b>Above three low-risk factors + healthy body weight</b>                             |                                       |                  |                  |                  |                  |         |
| N                                                                                     | 679                                   | 2,700            | 2,549            | 1,149            |                  |         |
| Multivariable-adjusted model                                                          | 1.00 (ref)                            | 0.89 (0.78-1.00) | 0.89 (0.79-1.01) | 0.82 (0.70-0.95) | -                | 0.03    |
| <b>Above three low-risk factors + moderate alcohol drinking</b>                       |                                       |                  |                  |                  |                  |         |
| N                                                                                     | 676                                   | 2,589            | 2,573            | 1,239            |                  |         |
| Multivariable-adjusted model                                                          | 1.00 (ref)                            | 0.88 (0.78-1.00) | 0.86 (0.76-0.97) | 0.80 (0.69-0.92) | -                | 0.004   |
| <b>Above three low-risk factors + healthy body weight + moderate alcohol drinking</b> |                                       |                  |                  |                  |                  |         |
| N                                                                                     | 301                                   | 971              | 1,014            | 453              | 139              |         |
| Multivariable-adjusted model                                                          | 1.00 (ref)                            | 0.89 (0.78-1.02) | 0.89 (0.78-1.01) | 0.84 (0.72-0.97) | 0.73 (0.60-0.91) | 0.006   |

Multivariable model was adjusted for age at diagnosis (years), sex (men, women), race (white, non-white), total energy intake (in quartiles), current aspirin use (yes, no), presence of hypertension (yes, no), presence of hypercholesterolemia (yes, no), use of antihypertensive drugs (yes, no), and use of cholesterol-lowering drugs (yes, no).

**eTable 5.** Relative Risk (95% CI) of Diabetic Microvascular Complications According to Different Combinations of Low-Risk Lifestyle Factors After Diabetes Diagnosis

|                                                                                       | Number of Low-Risk Lifestyle Factors* |                  |                  |                  |                  | P trend |
|---------------------------------------------------------------------------------------|---------------------------------------|------------------|------------------|------------------|------------------|---------|
|                                                                                       | 0                                     | 1                | 2                | 3                | ≥4               |         |
| <b>Three low-risk factors (healthy diet, regular physical activity, non-smoking)</b>  |                                       |                  |                  |                  |                  |         |
| N                                                                                     | 617                                   | 3,184            | 3,276            |                  |                  |         |
| Multivariable-adjusted model                                                          | 1.00 (ref)                            | 0.89 (0.78-1.01) | 0.85 (0.74-0.96) | -                | -                | 0.01    |
| <b>Above three low-risk factors + healthy body weight</b>                             |                                       |                  |                  |                  |                  |         |
| N                                                                                     | 535                                   | 2,820            | 2,417            | 1,305            |                  |         |
| Multivariable-adjusted model                                                          | 1.00 (ref)                            | 0.89 (0.78-1.02) | 0.91 (0.79-1.04) | 0.77 (0.66-0.90) | -                | 0.004   |
| <b>Above three low-risk factors + moderate alcohol drinking</b>                       |                                       |                  |                  |                  |                  |         |
| N                                                                                     | 566                                   | 2,803            | 2,502            | 1,206            |                  |         |
| Multivariable-adjusted model                                                          | 1.00 (ref)                            | 0.91 (0.80-1.04) | 0.86 (0.75-0.98) | 0.77 (0.67-0.90) | -                | <0.001  |
| <b>Above three low-risk factors + healthy body weight + moderate alcohol drinking</b> |                                       |                  |                  |                  |                  |         |
| N                                                                                     | 255                                   | 1,040            | 964              | 473              | 146              |         |
| Multivariable-adjusted model                                                          | 1.00 (ref)                            | 0.90 (0.78-1.04) | 0.88 (0.76-1.02) | 0.82 (0.70-0.97) | 0.68 (0.55-0.83) | <0.001  |

Multivariable model was adjusted for age at diagnosis (years), sex (men, women), race (white, non-white), total energy intake (in quartiles), current aspirin use (yes, no), presence of hypertension (yes, no), presence of hypercholesterolemia (yes, no), use of antihypertensive drugs (yes, no), use of cholesterol-lowering drugs (yes, no), and lifestyle score before diabetes diagnosis.
