# Supplementary material for: Adherence to a Healthy Lifestyle in Association With Microvascular Complications Among Adults With Type 2 Diabetes
Source: PubMed Central journal article supplement (PMC9880795; doi:10.1001/jamanetworkopen.2022.52239), 2023-01-26
Supplement: jamanetwopen-e2252239-s002.pdf [file jamanetwopen-e2252239-s002.pdf]

## Data Sharing Statement

Liu. Adherence to a Healthy Lifestyle in Association With Microvascular Complications Among Adults With Type 2 Diabetes. *JAMA Netw Open*. Published January 26, 2023.  
doi:10.1001/jamanetworkopen.2022.52239

### Data

**Data available:** No
